# Supplementary material
Source: Research Square preprint supplement (doi:10.21203/rs.3.rs-9803162/v1)
Supplement: Supplementary file 1 [file 422f138e7ec7c377d4785bdf.docx]

**Supplementary materials**

| Supplementary Table 1 Lytic Spectrum of Phage LP4H1 | | |
| --- | --- | --- |
| Lm strain designation | Serotype | The lytic capacity of LP4H1 |
| 10403S | 1/2a | +++ |
| GZ5-3 | 1/2a | ++ |
| GZ3-1 | 1/2a | ++ |
| JX1-4 | 1/2a | +++ |
| JX2-2 | 1/2a | +++ |
| JX2-4 | 1/2a | ++ |
| JX4-7 | 1/2a | ++ |
| JX5-1 | 1/2a | + |
| JX8-3 | 1/2a | +++ |
| HN1-4 | 1/2a | ++ |
| HN2-2 | 1/2a | +++ |
| HN2-4 | 1/2a | +++ |
| HN3-11 | 1/2a | ++ |
| HN4-5 | 1/2a | + |
| HN4-9 | 1/2a | +++ |
| HN4-13 | 1/2a | +++ |
| HN6-5 | 1/2a | ++ |
| XJ2-6 | 1/2a | +++ |
| XJ6-2 | 1/2a | ++ |
| JX2-9 | 1/2b | ++ |
| HAC2305LH9 | 1/2b | +++ |
| JX3-3 | 1/2b | +++ |
| JX6-2 | 1/2b | ++ |
| JX6-3 | 1/2b | +++ |
| HN1-7 | 1/2b | +++ |
| HN4-12 | 1/2b | ++ |
| HN5-4 | 1/2b | ++ |
| HN7-3 | 1/2b | +++ |
| XJ1-2 | 1/2b | ++ |
| TBT5 | 1/2b | ++ |
| TFHC5 | 1/2b | +++ |
| TFHC8 | 1/2b | ++ |
| TFHC9 | 1/2b | +++ |
| TFHA3 | 1/2b | ++ |
| TFHA4 | 1/2b | +++ |
| NTSN | 4b | +++ |
| TZ0402 | 4b | ++ |
| BJ124 | 4b | ++ |
| BJ126 | 4b | +++ |
| XYSN | 4h | +++ |
| Lm68 | 4h | +++ |
| YT2-10 | 4h | ++ |
| YF2-5 | 4h | +++ |
| Note: Lytic ability was categorized based on the efficiency of plating (EOP) as follows: “+++” for EOP ≥ 0.5, “++” for 0.1 < EOP < 0.5, “+” for 0.0001 ≤ EOP ≤ 0.1, and “–” for EOP < 0.0001. EOP was calculated as the phage titer on the tested strain divided by the phage titer on Lm XYSN. | | |
